# Supplementary material
Source: Royal Society of Chemistry journal article supplement (doi:10.1039/d5cp04855a)
Supplement: d5cp04855a12.pdf [file d5cp04855a12.pdf]

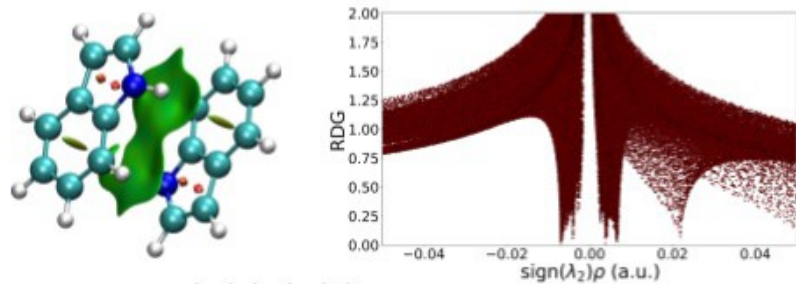

Indole-Indole

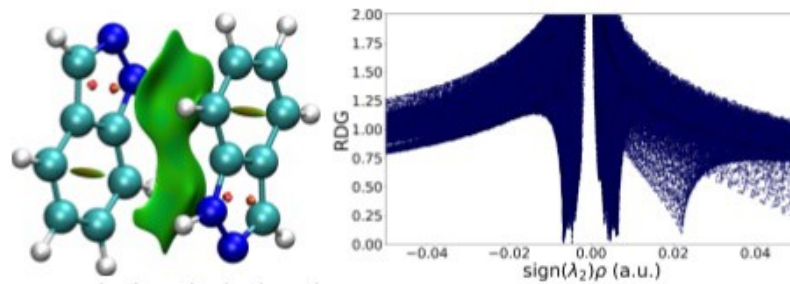

Indazole-Indazole

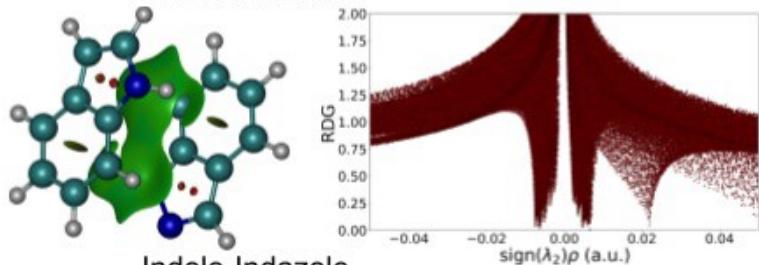

Indole-Indazole

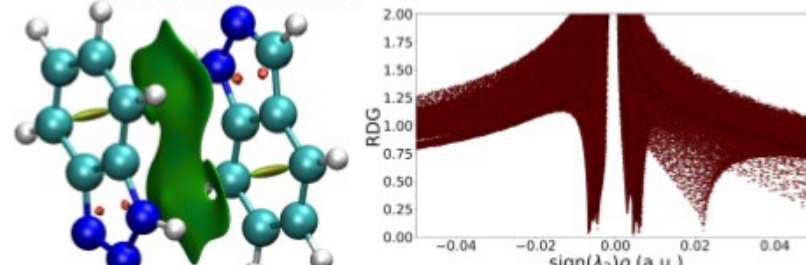

Indazole-Benzotriazole

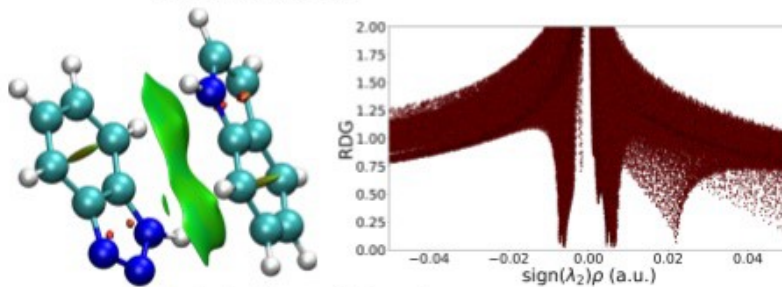

Indole-Benzotriazole

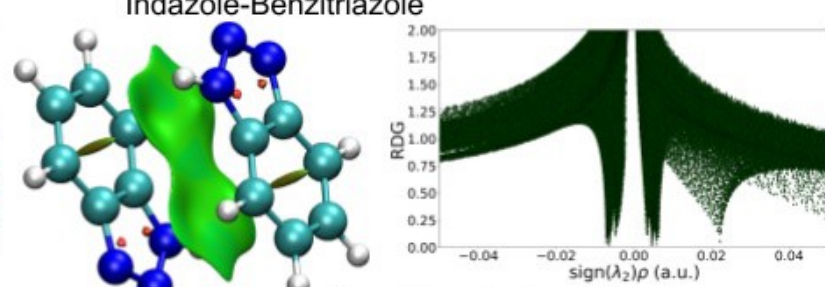

Benzotriazole-Benzotriazole
