# Supplementary material
Source: Royal Society of Chemistry journal article supplement (doi:10.1039/d5cp04855a)
Supplement: d5cp04855a13.pdf [file d5cp04855a13.pdf]

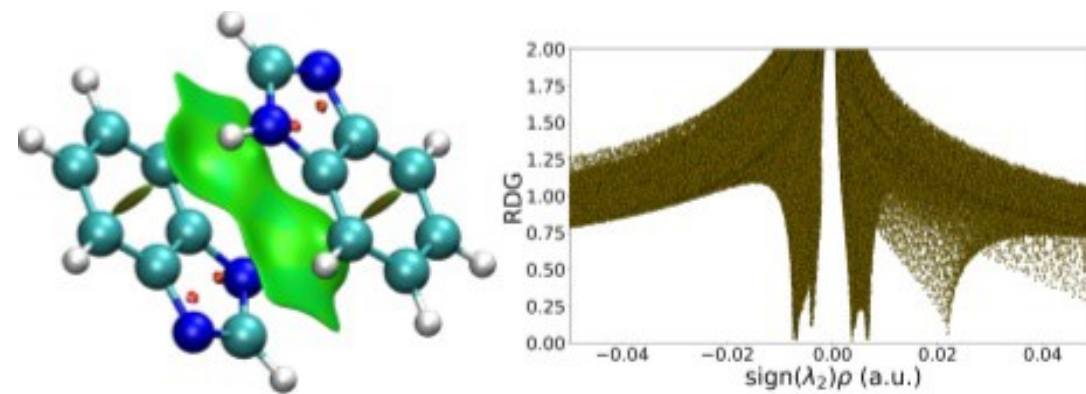

Benzimidazole-Benzimidazole

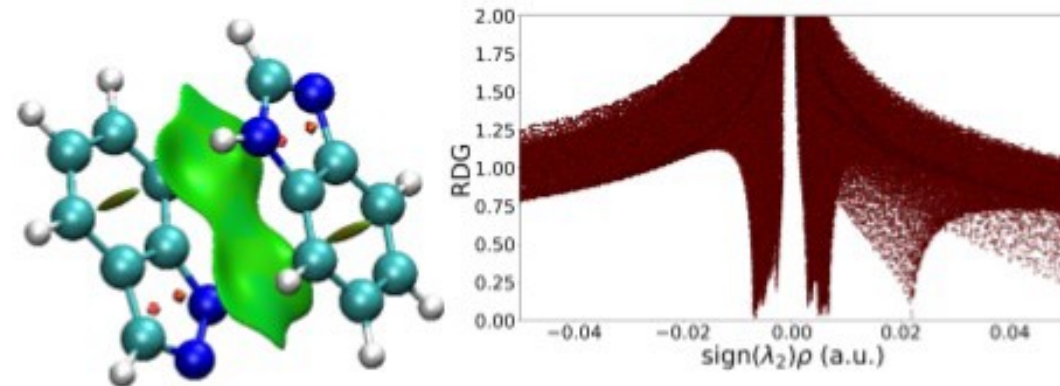

Benzimidazole-Indazole

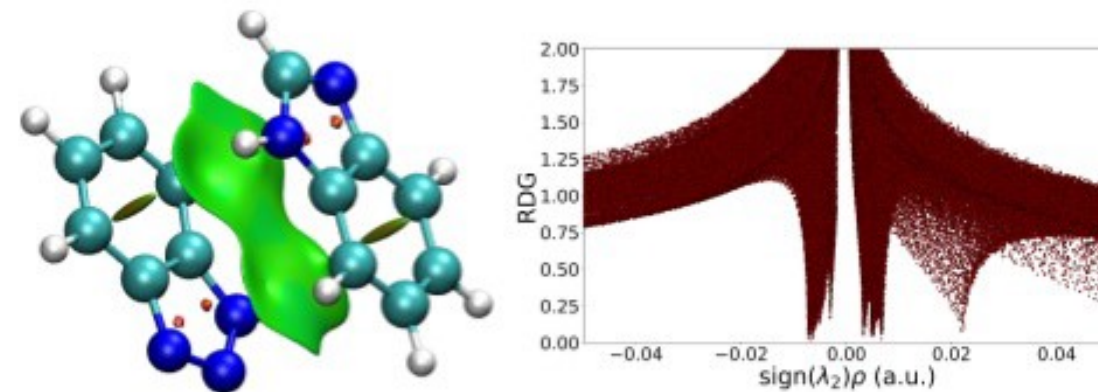

Benzimidazole-Benzotriazole

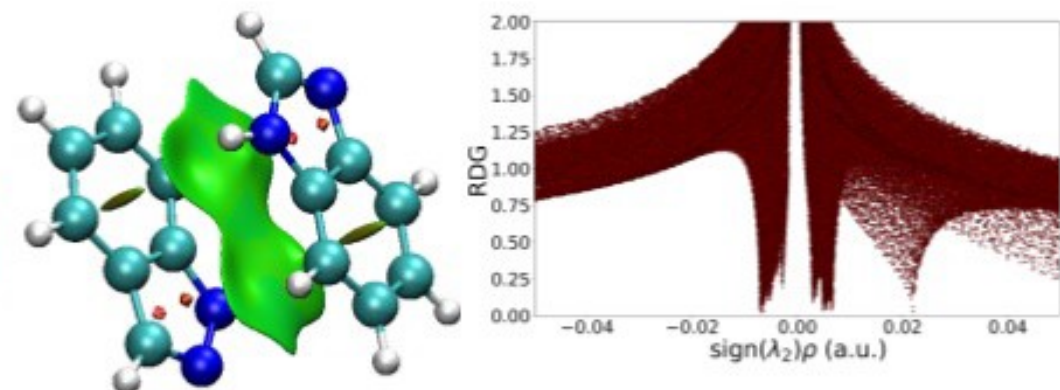

Benzimidazole-Indole
