# Supplementary material
Source: Royal Society of Chemistry journal article supplement (doi:10.1039/d5cp04855a)

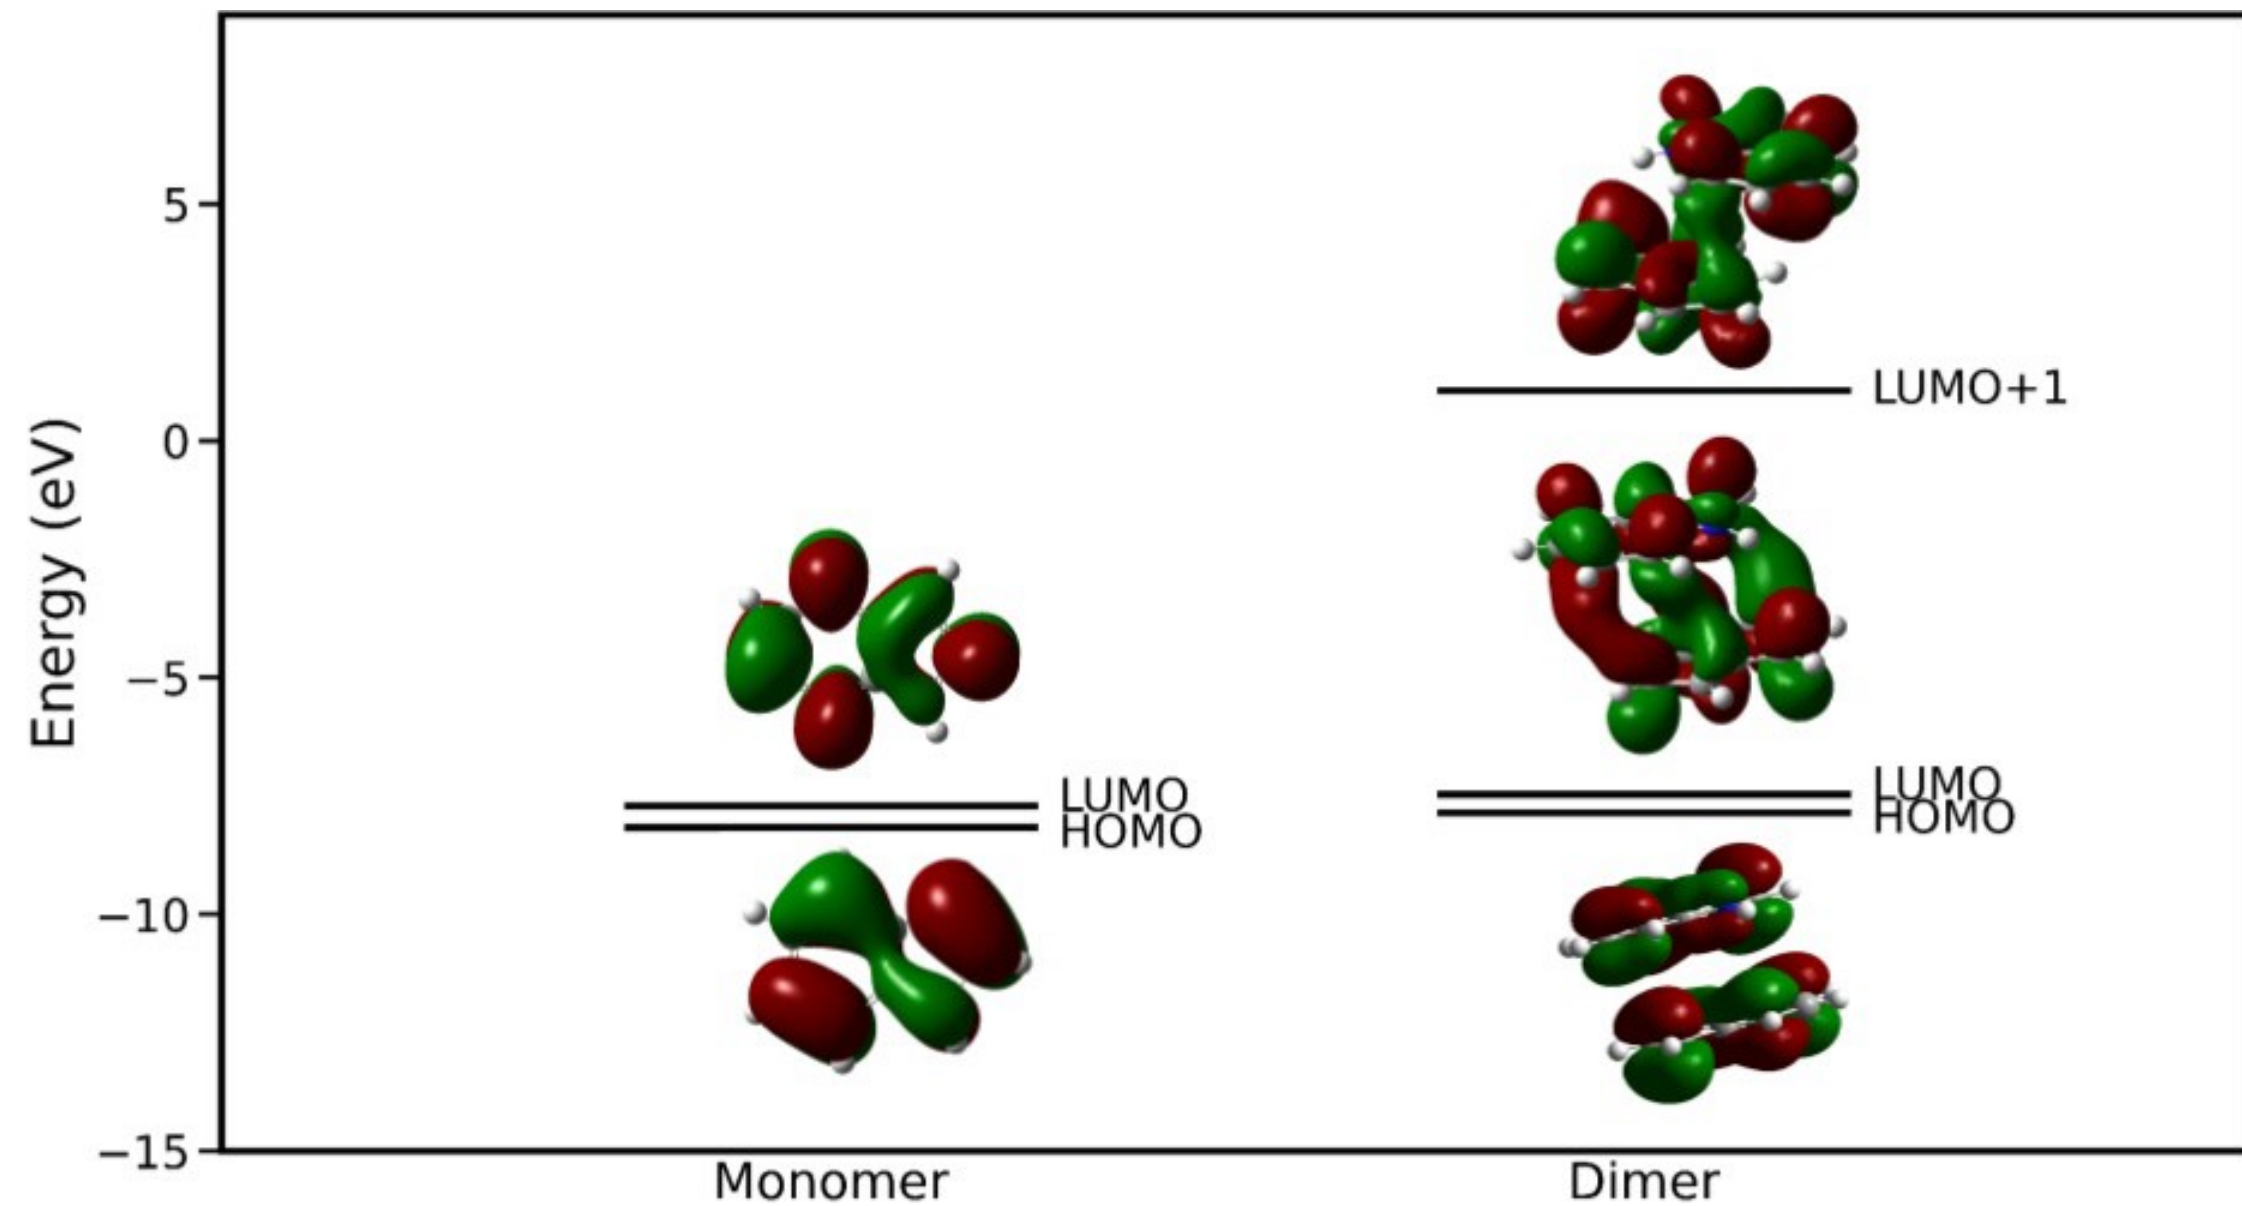

Supplement: d5cp04855a1.pdf [file d5cp04855a1.pdf]

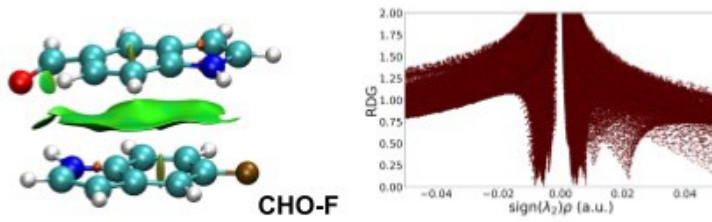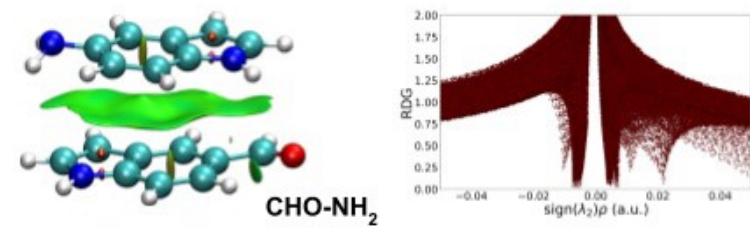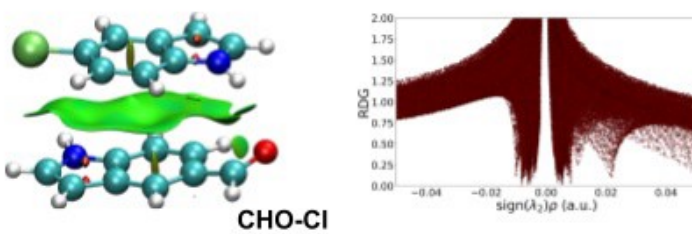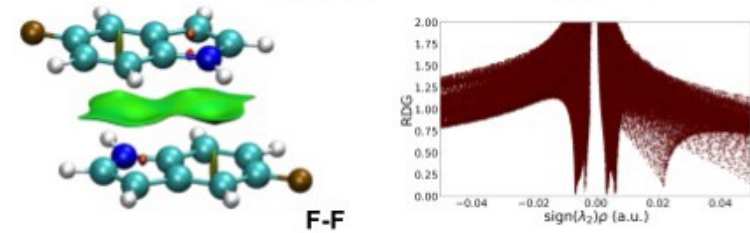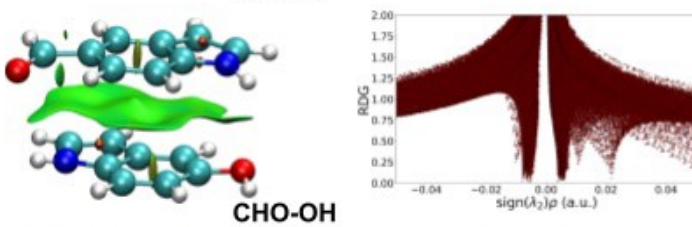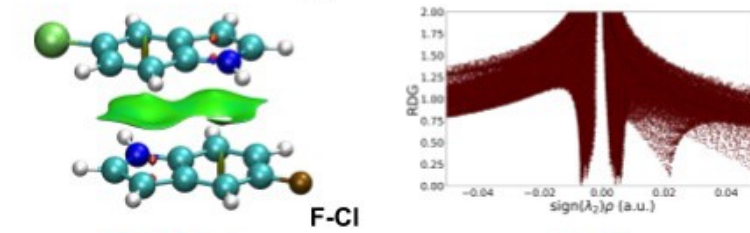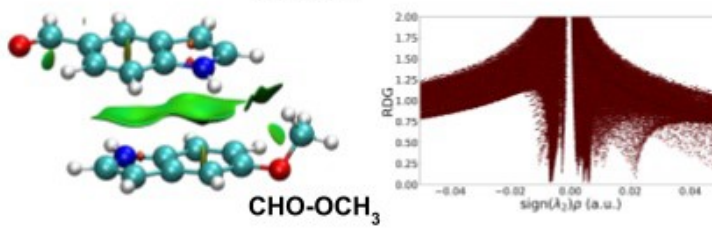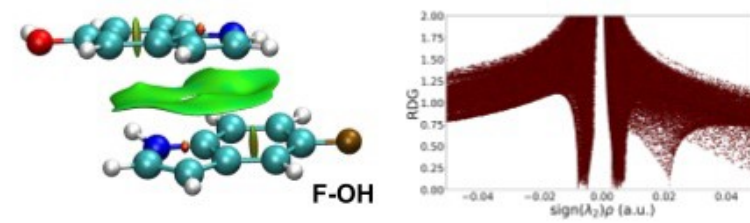

Supplement: d5cp04855a10.pdf [file d5cp04855a10.pdf]

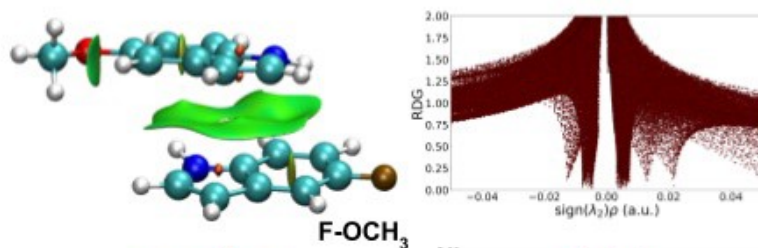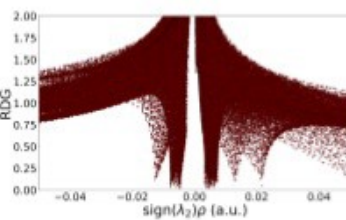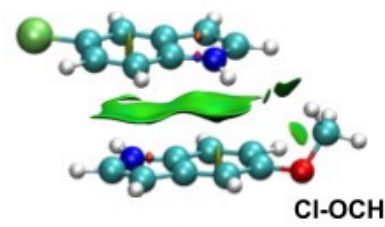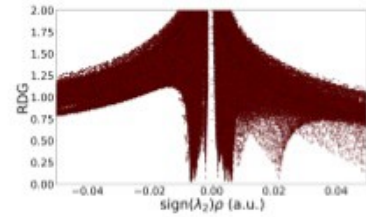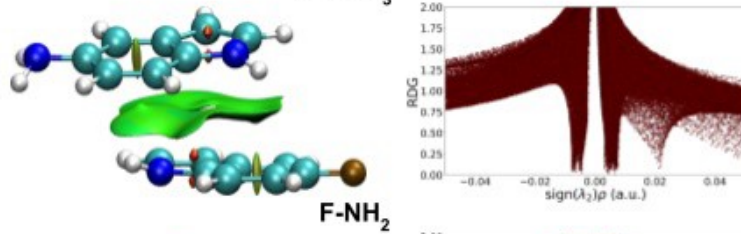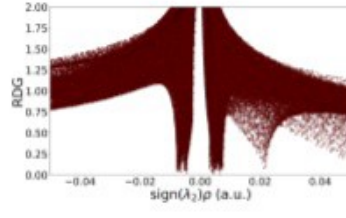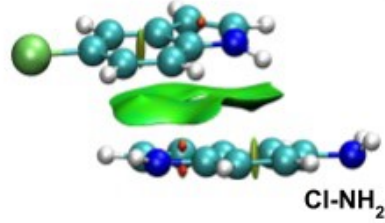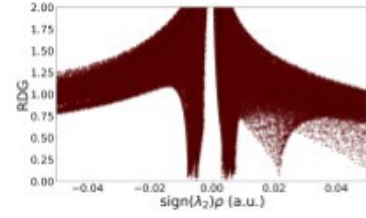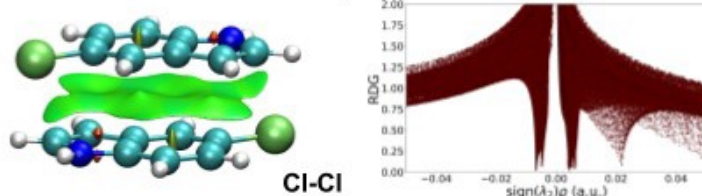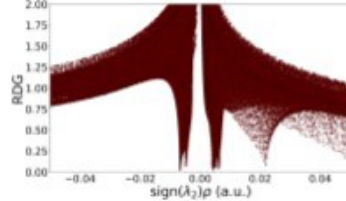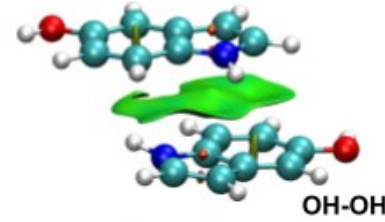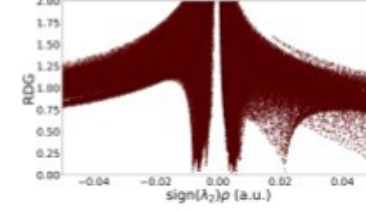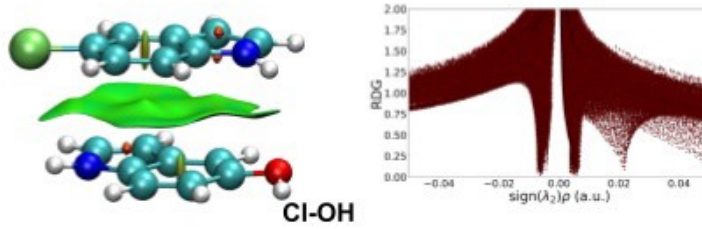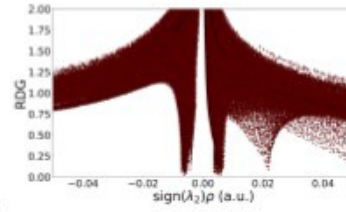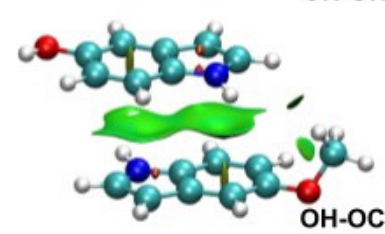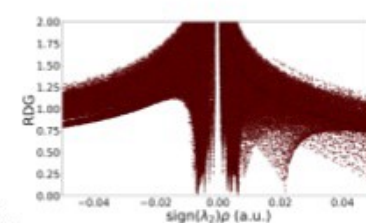

Supplement: d5cp04855a11.pdf [file d5cp04855a11.pdf]

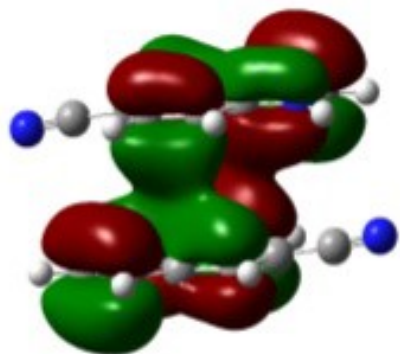

**HOMO**

47.66%

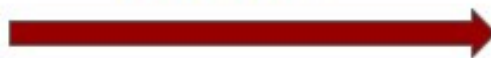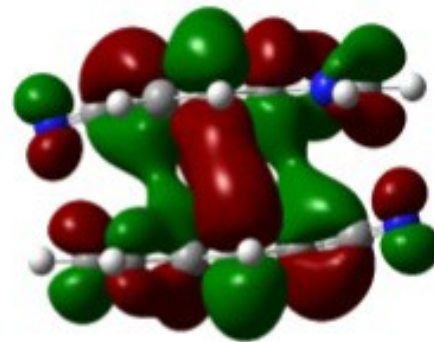

**LUMO**

$S_0 \rightarrow S_2$

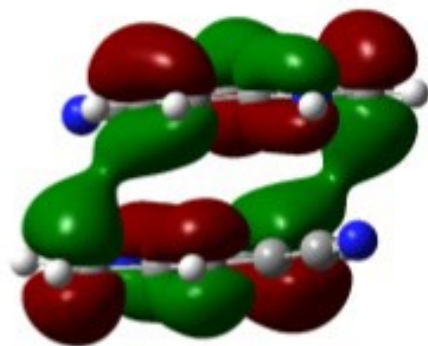

**HOMO-1**

34.93%

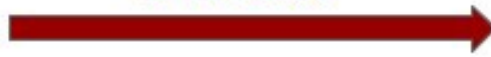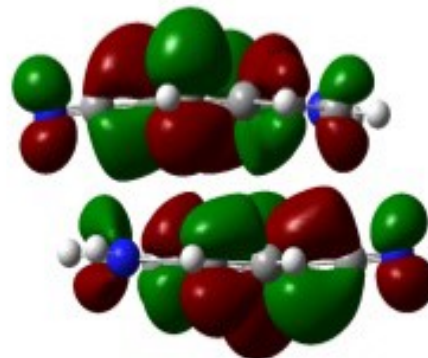

**LUMO+1**

Supplement: d5cp04855a2.pdf [file d5cp04855a2.pdf]

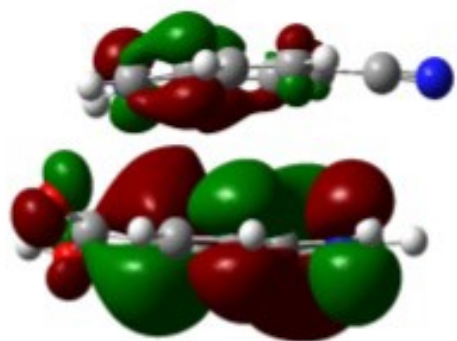

**HOMO**

53.84%

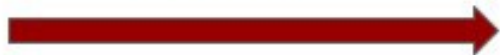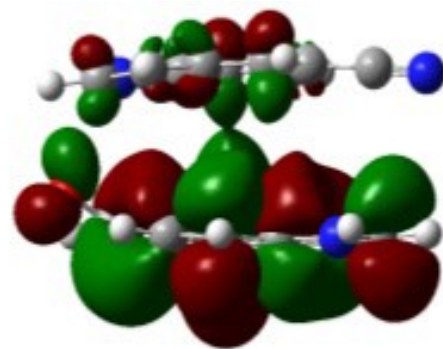

**LUMO**

$S_0 \rightarrow S_3$

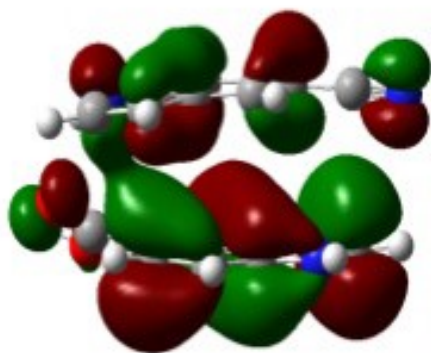

**HOMO-1**

24.07%

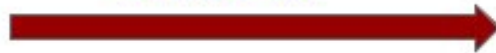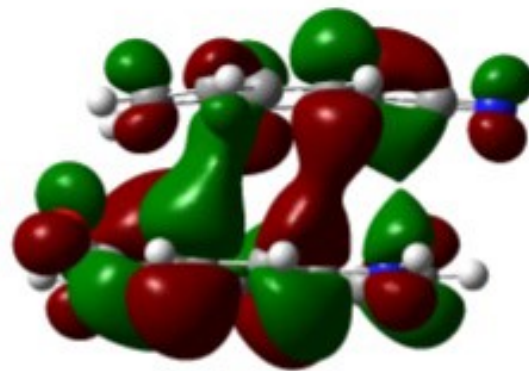

**LUMO+1**

Supplement: d5cp04855a3.pdf [file d5cp04855a3.pdf]

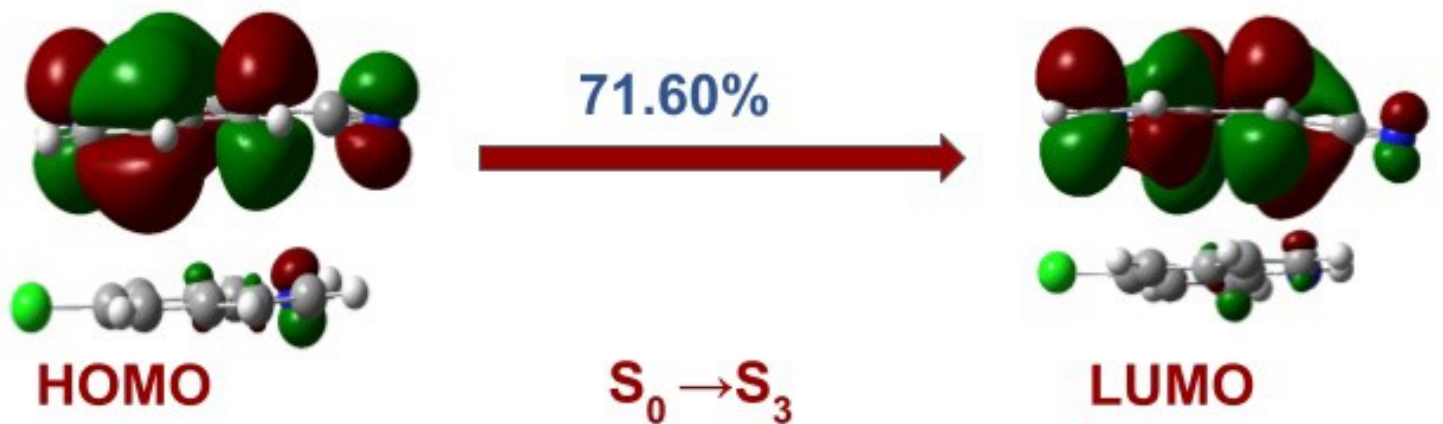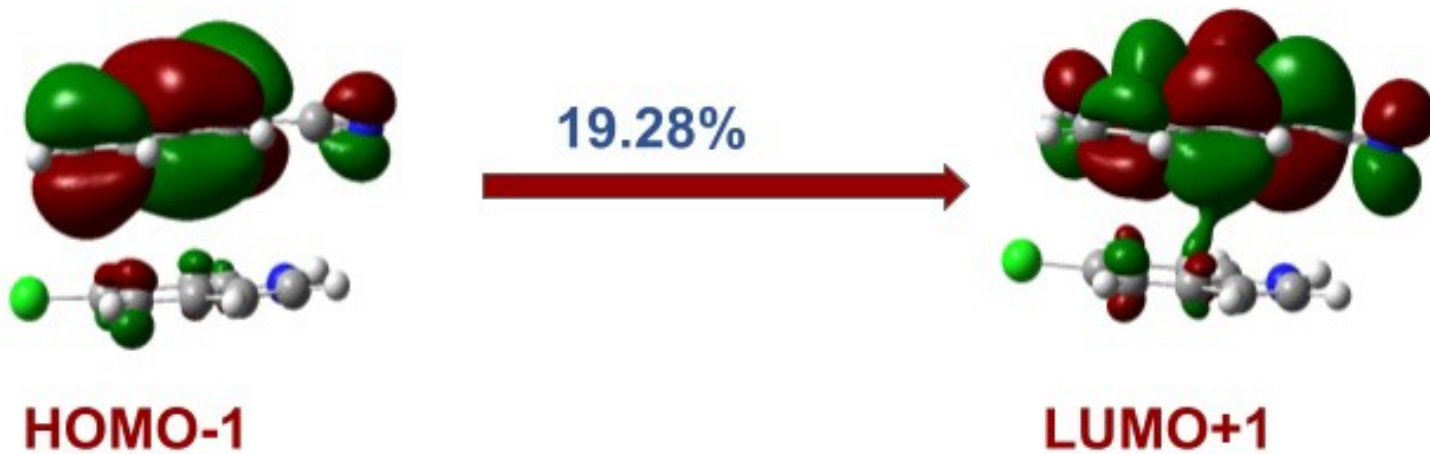

Supplement: d5cp04855a4.pdf [file d5cp04855a4.pdf]

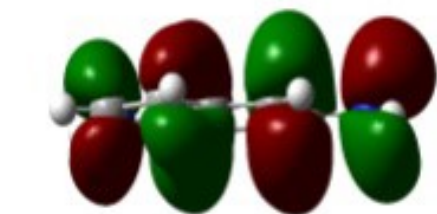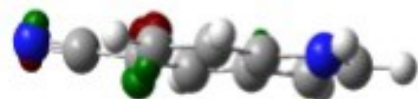

**HOMO**

94.15%

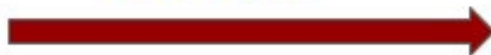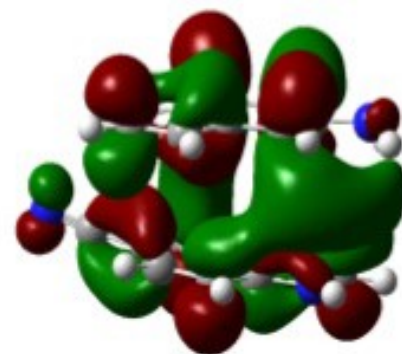

**LUMO**

$S_0 \rightarrow S_1$

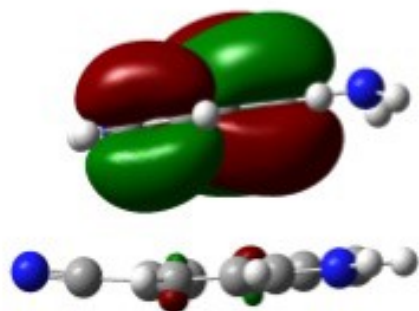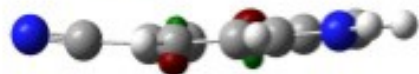

**HOMO-1**

4.34%

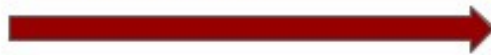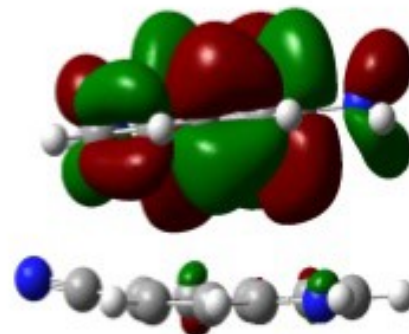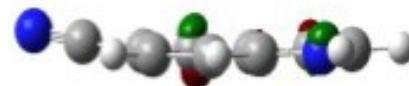

**LUMO+1**

Supplement: d5cp04855a5.pdf [file d5cp04855a5.pdf]

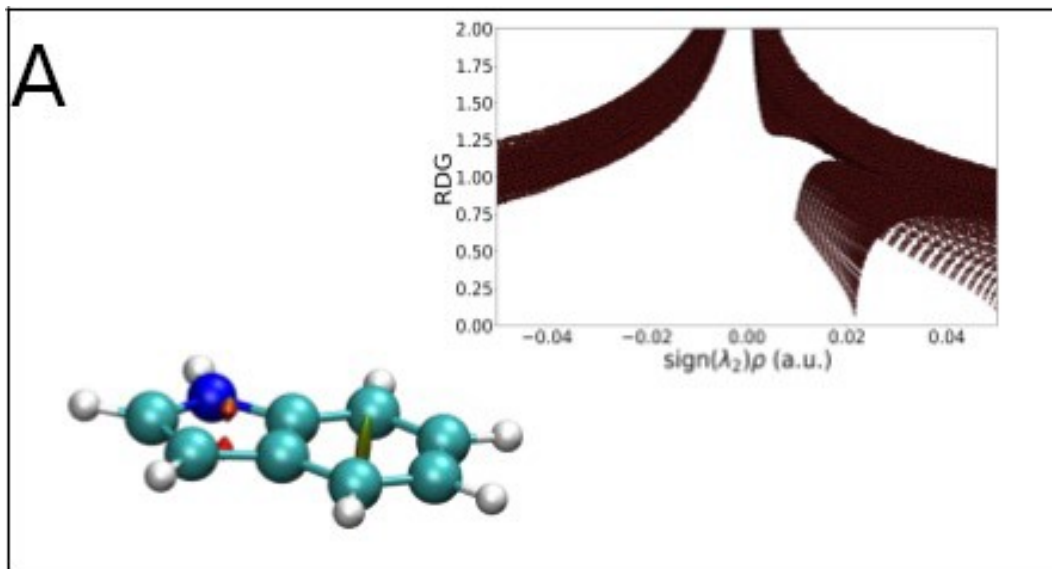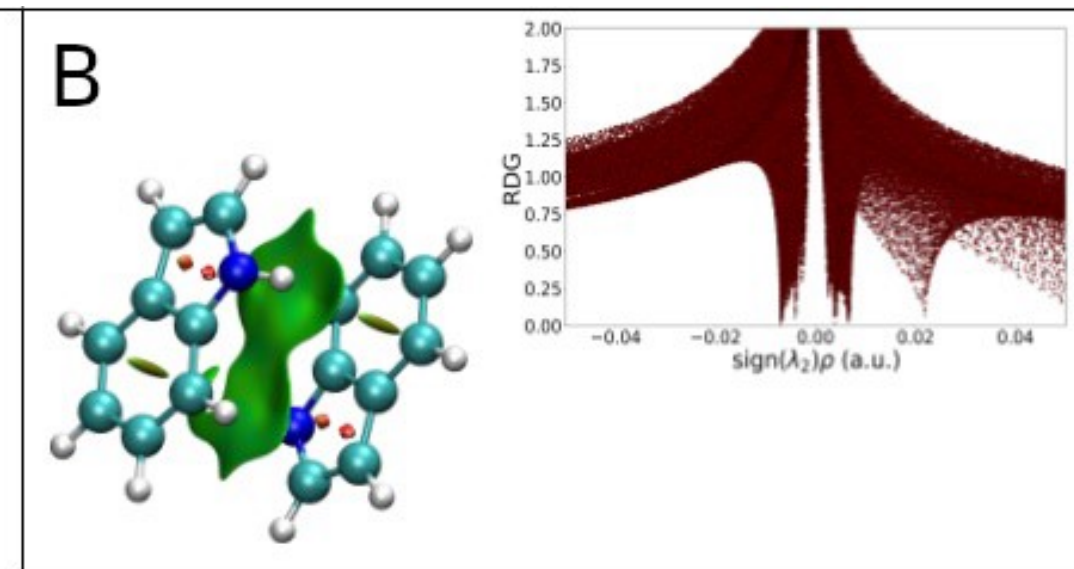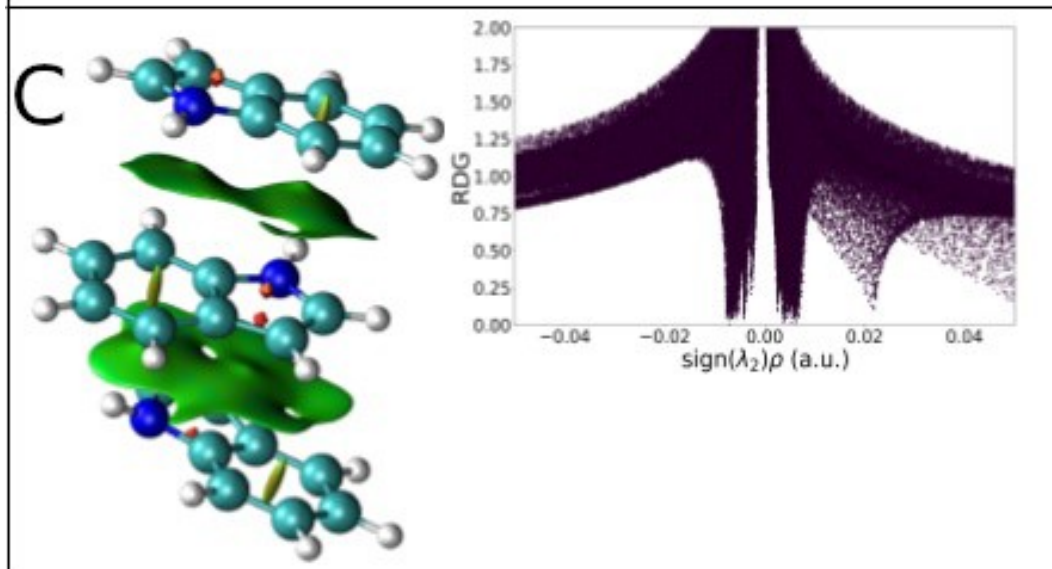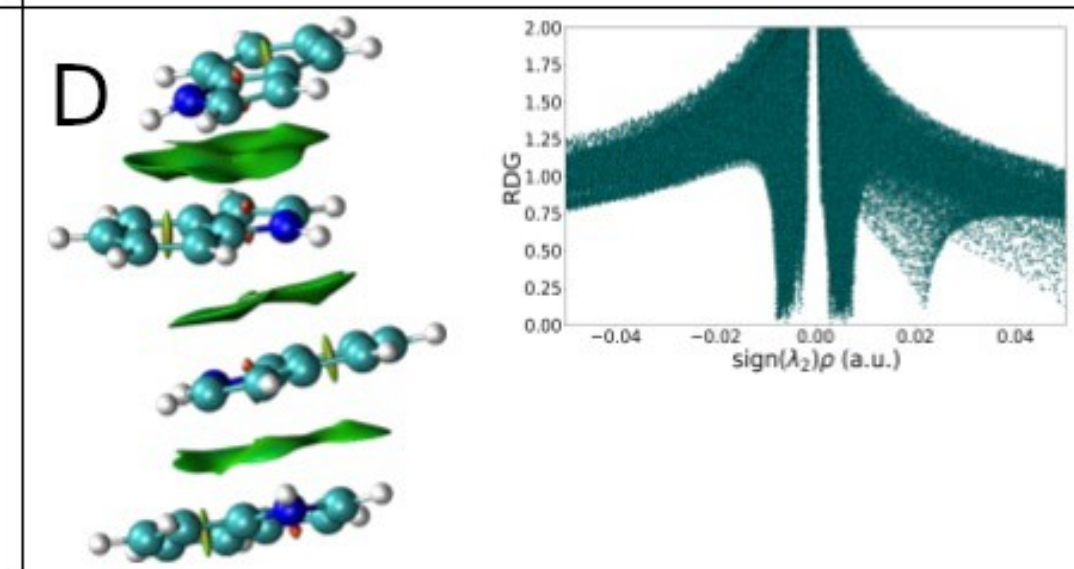

Supplement: d5cp04855a6.pdf [file d5cp04855a6.pdf]

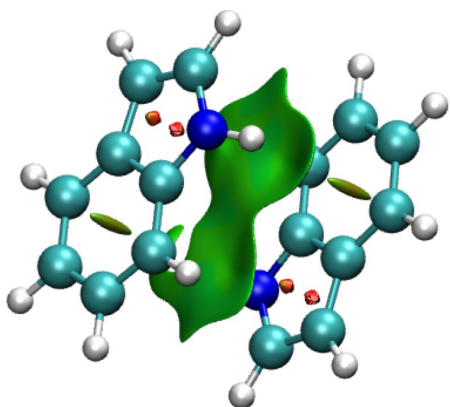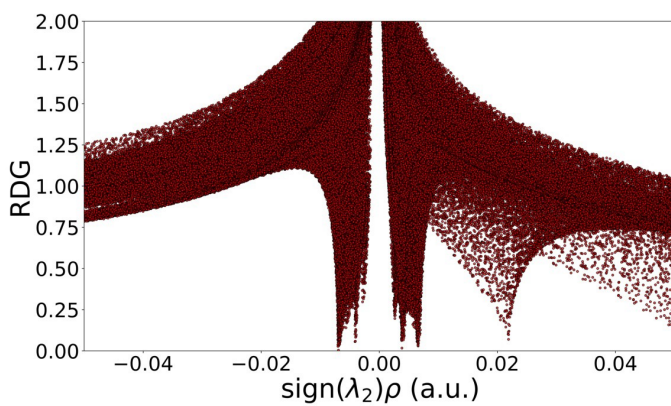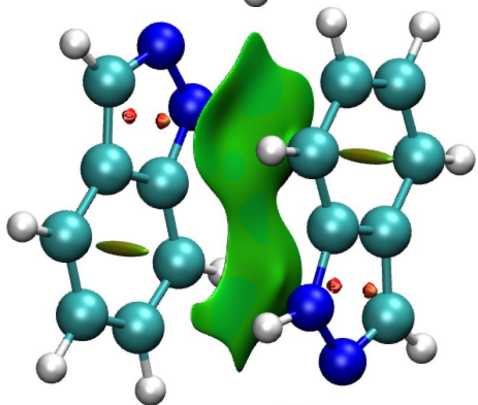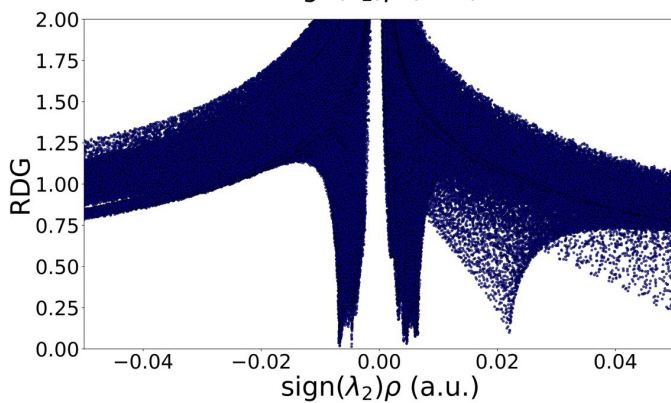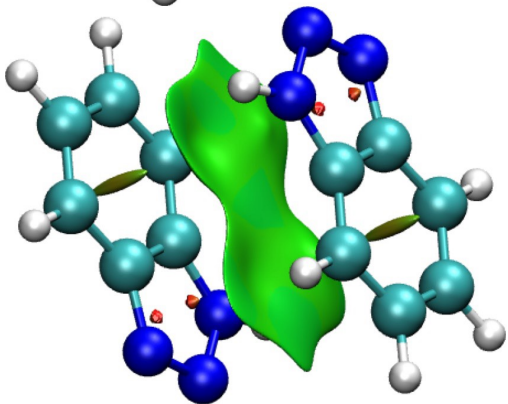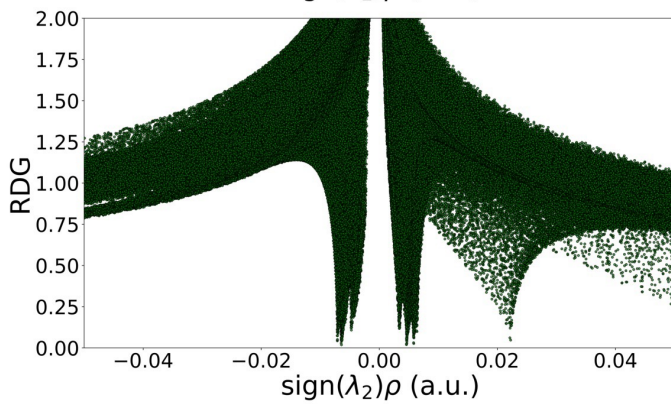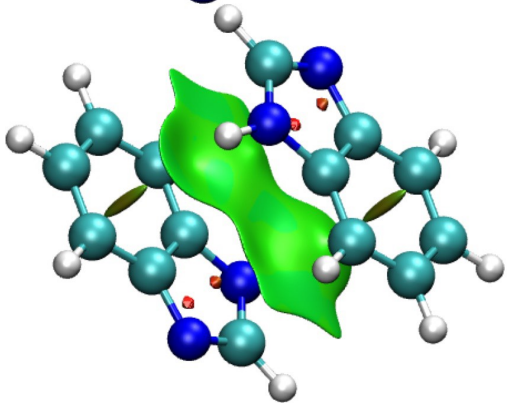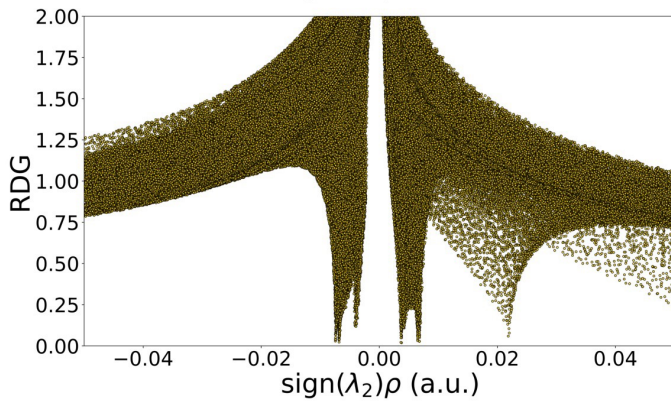

Supplement: d5cp04855a7.pdf [file d5cp04855a7.pdf]

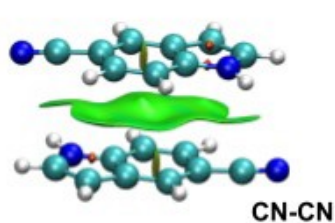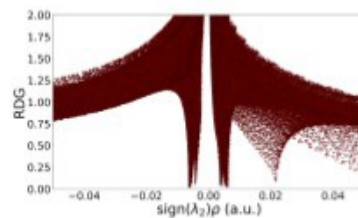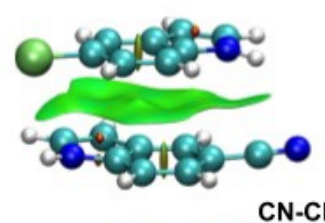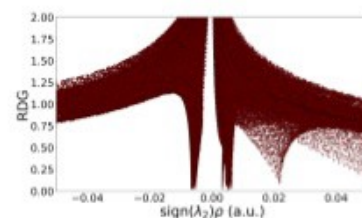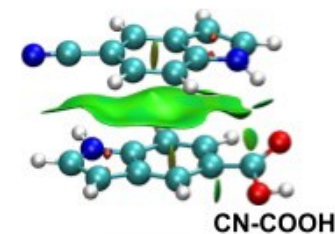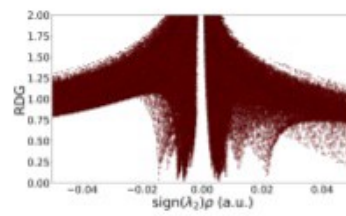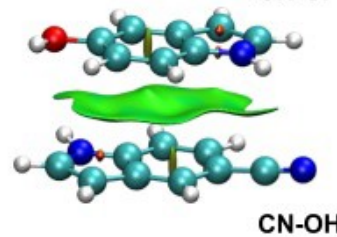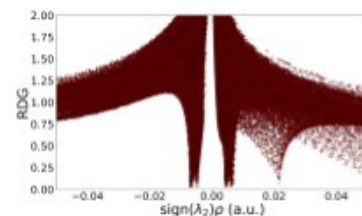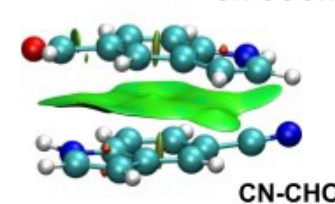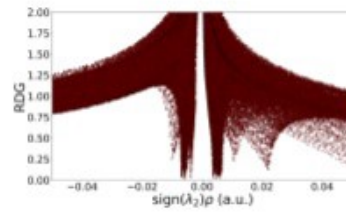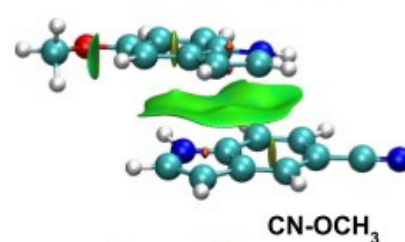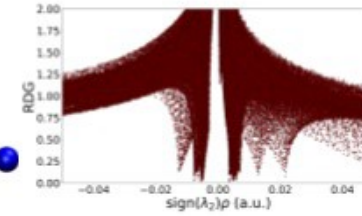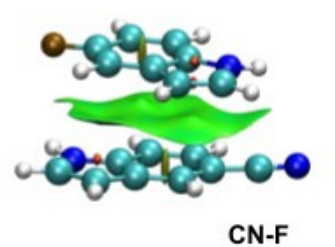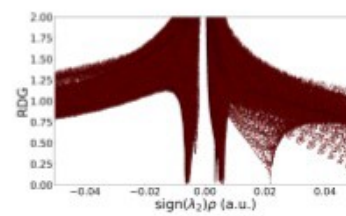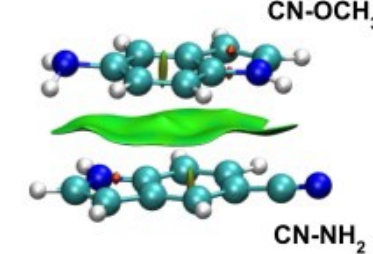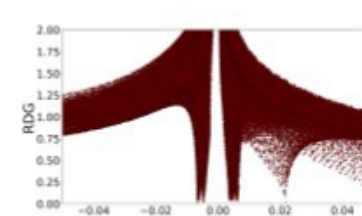

Supplement: d5cp04855a8.pdf [file d5cp04855a8.pdf]

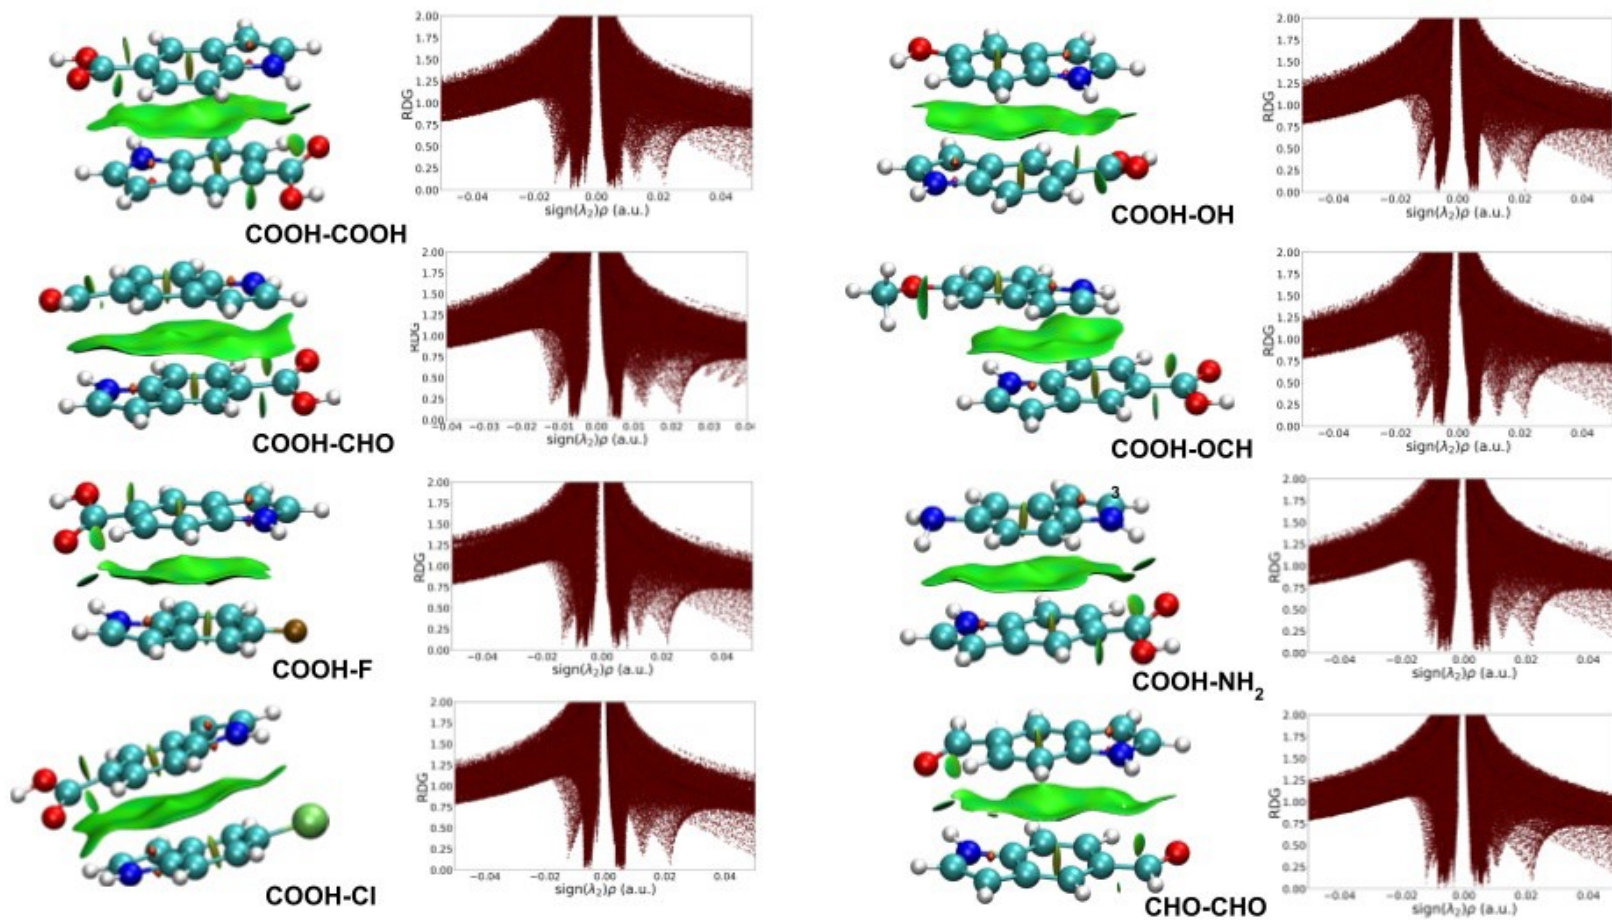

Supplement: d5cp04855a9.pdf [file d5cp04855a9.pdf]
